# Supplementary material for: Exploring the pressure–temperature behaviour of crystalline and plastic crystalline phases of N-isopropylpropionamide
Source: Royal Society of Chemistry journal article supplement (doi:10.1039/c5ce00032g), 2015-01-01
Supplement: c5ce00032g1.pdf [file c5ce00032g1.pdf]

## Supplementary information

### Exploring the pressure-temperature behaviour of crystalline and plastic crystalline phases of *N*-isopropylpropionamide

R. Quesada-Cabrera<sup>a</sup>, Y. Filinchuk<sup>b</sup>, P.F. McMillan<sup>a</sup>, E. Nies<sup>c</sup>, V. Dmitriev<sup>d</sup>, F. Meersman<sup>a,e</sup>

Table S1 – Cell parameters and volume estimated in the refinement of X-ray diffraction data collected from the crystalline phase of NiPPA up to 10.3 GPa.

| Pressure (GPa) | <i>a</i> (Å) | <i>b</i> (Å) | <i>c</i> (Å) | β (°)    | Volume (Å <sup>3</sup> ) |
|----------------|--------------|--------------|--------------|----------|--------------------------|
| 0.1            | 16.73(2)     | 8.88(3)      | 4.92(2)      | 97.7(7)  | 724.8                    |
| 0.5            | 16.25(9)     | 8.83(9)      | 4.89(1)      | 98.0(0)  | 696.1                    |
| 1.1            | 15.76(0)     | 8.79(2)      | 4.86(1)      | 98.2(0)  | 666.7                    |
| 2              | 15.26(3)     | 8.70(1)      | 4.81(0)      | 98.3(8)  | 632.0                    |
| 3              | 14.92(7)     | 8.62(3)      | 4.76(7)      | 98.5(4)  | 606.8                    |
| 4              | 14.69(8)     | 8.56(5)      | 4.73(8)      | 98.7(9)  | 589.5                    |
| 5              | 14.50(0)     | 8.51(8)      | 4.71(1)      | 98.9(7)  | 574.8                    |
| 6              | 14.24(8)     | 8.46(6)      | 4.67(1)      | 99.1(0)  | 556.3                    |
| 7.2            | 14.03(8)     | 8.41(8)      | 4.64(4)      | 99.3(9)  | 541.4                    |
| 8              | 13.90(2)     | 8.39(8)      | 4.63(3)      | 99.5(9)  | 533.4                    |
| 9              | 13.71(2)     | 8.37(6)      | 4.62(3)      | 99.9(1)  | 523.1                    |
| 10.3           | 13.52(9)     | 8.33(6)      | 4.61(4)      | 100.2(7) | 512.0                    |

Table S2 – Crystallographic data of the NiPPA structure up to 10.3 GPa.

| P<br>(GPa) | Bond Length (Å)   |           |           |           |           |           |           |        |
|------------|-------------------|-----------|-----------|-----------|-----------|-----------|-----------|--------|
|            | C1C2              | C2C3      | C2N4      | N4C5      | C5C6      | C5O8      | C6C7      |        |
| 0.1        | 1.4788(5)         | 1.4346(3) | 1.5013(5) | 1.4068(3) | 1.4890(4) | 1.2907(3) | 1.4838(6) |        |
| 0.5        | 1.4654(3)         | 1.4054(4) | 1.4835(3) | 1.3883(3) | 1.4642(3) | 1.2820(3) | 1.4758(3) |        |
| 1.1        | 1.4512(3)         | 1.3743(4) | 1.4652(4) | 1.3687(3) | 1.4386(3) | 1.2735(3) | 1.4675(3) |        |
| 2          | 1.4312(4)         | 1.3414(5) | 1.4418(4) | 1.3451(4) | 1.4095(4) | 1.2596(4) | 1.4520(4) |        |
| 3          | 1.4155(4)         | 1.3188(5) | 1.4239(4) | 1.3280(4) | 1.3882(4) | 1.2480(4) | 1.4388(4) |        |
| 4          | 1.4044(4)         | 1.3046(6) | 1.4105(4) | 1.3171(4) | 1.3726(4) | 1.2396(4) | 1.4290(4) |        |
| 5          | 1.61(2)           | 1.45(2)   | 1.55(2)   | 1.37(2)   | 1.49(2)   | 1.33(1)   | 1.54(2)   |        |
| 6          | 1.5997(2)         | 1.4383(3) | 1.5306(2) | 1.3583(2) | 1.4738(2) | 1.3200(2) | 1.5279(2) |        |
| 7.2        | 1.5888(2)         | 1.4243(3) | 1.5156(2) | 1.3466(3) | 1.4552(3) | 1.3116(2) | 1.5178(2) |        |
| 8          | 1.5836(2)         | 1.4163(4) | 1.5073(3) | 1.3402(3) | 1.4438(4) | 1.3082(2) | 1.5133(3) |        |
| 9          | 1.5774(2)         | 1.4058(3) | 1.4964(2) | 1.3320(3) | 1.4281(3) | 1.3046(2) | 1.5078(2) |        |
| 10.3       | 1.5691(3)         | 1.3964(5) | 1.4835(3) | 1.3240(4) | 1.4117(4) | 1.3009(3) | 1.4994(3) |        |
|            | Bond Angle (°)    |           |           |           |           |           |           |        |
|            | C1C2C3            | C1C2N4    | C3C2N4    | C2N4C5    | N4C5C6    | N4C5O8    | C6C5O8    | C5C6C7 |
| 0.1        | 127.19            | 122.9     | 97.76     | 123.06    | 126.86    | 118.28    | 114.76    | 117.22 |
| 0.5        | 126.89            | 124.04    | 96.77     | 122.65    | 126.38    | 118.79    | 114.74    | 117.83 |
| 1.1        | 126.57            | 125.26    | 95.69     | 122.2     | 125.83    | 119.31    | 114.77    | 118.14 |
| 2          | 126.31            | 126.27    | 94.77     | 121.81    | 125.36    | 119.77    | 114.78    | 118.93 |
| 3          | 126.16            | 126.89    | 94.21     | 121.57    | 125.07    | 120.07    | 114.77    | 119.25 |
| 4          | 126.07            | 127.32    | 93.82     | 121.4     | 124.89    | 120.35    | 114.68    | 119.52 |
| 5          | 120               | 120       | 106       | 121       | 135       | 112       | 112       | 106    |
| 6          | 119.41            | 120.09    | 105.92    | 120.24    | 135       | 111.88    | 112.46    | 106.71 |
| 7.2        | 119.3             | 120.55    | 105.56    | 120       | 134.83    | 112.17    | 112.35    | 107.15 |
| 8          | 119.2             | 120.93    | 105.26    | 119.8     | 134.67    | 112.39    | 112.29    | 107.49 |
| 9          | 119.07            | 121.5     | 104.8     | 119.49    | 134.43    | 112.74    | 112.18    | 108.01 |
| 10.3       | 119.02            | 121.97    | 104.35    | 119.14    | 134.17    | 113.16    | 112.02    | 108.44 |
|            | Torsion Angle (°) |           |           |           |           |           |           |        |
|            | C1C2N4C5          | C3C2N4C5  | C2N4C5C6  | C2N4C5O8  | N4C5C6C7  | O8C5C6C7  |           |        |
| 0.1        | 72.7              | -143.24   | -166      | 17.75     | -123      | 53.36     |           |        |
| 0.5        | 72.64             | -143.3    | -166.13   | 17.6      | -123.5    | 52.9      |           |        |
| 1.1        | 73.17             | -143.36   | -166.28   | 17.43     | -124.09   | 52.35     |           |        |
| 2          | 73.62             | -143.42   | -166.42   | 17.27     | -124.61   | 51.86     |           |        |
| 3          | 73.87             | -143.49   | -166.5    | 17.17     | -124.93   | 51.57     |           |        |
| 4          | 73.94             | -143.61   | -166.56   | 17.11     | -125.11   | 51.41     |           |        |
| 5          | 59.2              | -161.1    | -162.2    | 8.2       | -102.2    | 88.1      |           |        |
| 6          | 59.59             | -161.34   | -161.91   | 7.81      | -102.52   | 87.8      |           |        |
| 7.2        | 59.64             | -161.41   | -161.94   | 7.78      | -102.53   | 87.76     |           |        |
| 8          | 59.69             | -161.45   | -161.97   | 7.77      | -102.55   | 87.71     |           |        |
| 9          | 59.77             | -161.53   | -162.01   | 7.73      | -102.58   | 87.63     |           |        |
| 10.3       | 59.78             | -161.63   | -162.07   | 7.7       | -102.59   | 87.55     |           |        |

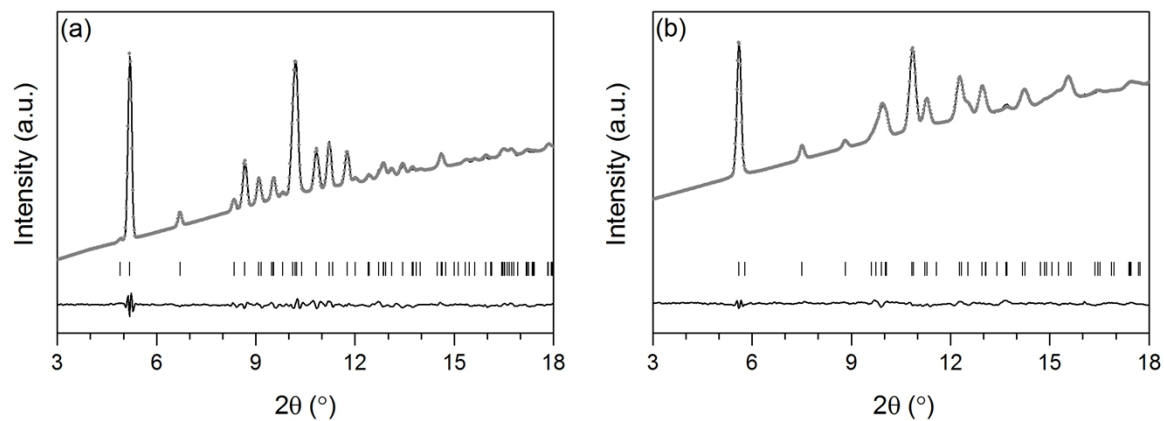

Figure S1 - Rietveld refinement profiles for the crystalline phase at (a) 0.1 MPa and (b) 6 GPa at ambient temperature ( $\lambda = 0.71171 \text{ \AA}$ ).

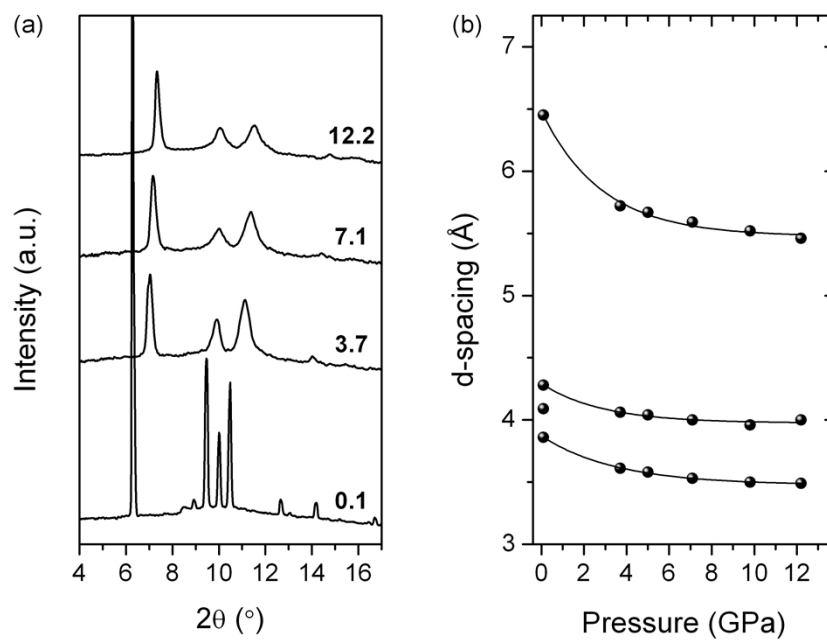

Figure S2 – (a) Selected X-ray diffraction patterns of the plastic crystalline phase of NiPPA and (b) peak shifts upon compression at 293 K (b). Pressure values in (a) are given in GPa.
